# Supplementary material
Source: MDPI journal article supplement (https://www.mdpi.com/2071-1050/13/17/9977)
Supplement: s1 [file s1]

Archive with 3 entries (3 files):
- S1v2.pdf
- S2v2.pdf
- S3v2.pdf
