# Supplementary material
Source: MDPI journal article supplement (https://www.mdpi.com/2071-1050/13/17/9977)
Supplement: s1 [file s1 › S1v2.pdf]

**Figure S1.** List of extracted topics of job advertisements in May 2021

| TOPIC                       | KEYWORDS                                                                                                                                                                                                                                                    | COHERENCE | CASES | % CASES |
|-----------------------------|-------------------------------------------------------------------------------------------------------------------------------------------------------------------------------------------------------------------------------------------------------------|-----------|-------|---------|
| <b>SKILLS COMMUNICATION</b> | SKILLS; COMMUNICATION; WRITTEN; ABILITY; EXCELLENT; ANALYTICAL; STRONG; EXCEL; EXPERIENCE;                                                                                                                                                                  | 0.455     | 797   | 86.35%  |
| <b>ANALYSIS CHAIN</b>       | ANALYSIS; CHAIN; SUPPLY; REPORTING; MANAGEMENT; FINANCE; FINANCIAL; INITIATIVES; BUSINESS;                                                                                                                                                                  | 0.371     | 792   | 85.81%  |
| <b>KEY SERVICE</b>          | KEY; SERVICE; TIMES; RELATIONSHIPS; ENSURE; DEMONSTRATE; DELIVER; ACHIEVE; CUSTOMERS; WHILST; HIGH; DELIVERY; BUSINESS;                                                                                                                                     | 0.366     | 775   | 83.97%  |
| <b>POLICIES PROCEDURES</b>  | POLICIES; PROCEDURES; SAFETY; STANDARDS; COMPLIANCE; QUALITY; ENSURE; HEALTH; MAINTENANCE; AGREED; APPROPRIATE; MANAGE; REVIEW; REPORTS; PERFORMANCE;                                                                                                       | 0.428     | 703   | 76.16%  |
| <b>SUPPLY CHAIN</b>         | STAKEHOLDERS; MARKET; CHAIN; SUPPLY; STRATEGY; EXTERNAL; INTERNAL; WIDER; CLOSELY; ACROSS; TEAMS; HEAD;<br>SUPPLY CHAIN;                                                                                                                                    | 0.359     | 698   | 75.62%  |
| <b>POLICY CANDIDATES</b>    | POLICY; CANDIDATES; FUNCTION; RECRUITMENT; FULL; CV; CONTACT; OBJECTIVES; INFORMATION; INDUSTRY; COMPLIANCE; PROFESSIONAL; DATA; SERVICES; BASIS; MEET; PERMANENT;                                                                                          | 0.432     | 686   | 74.32%  |
| <b>LEADERSHIP KPI</b>       | LEADERSHIP; KPI; DIRECT; CHANGE; OPERATIONAL; IMPROVEMENT; ENVIRONMENT; DRIVE; RESULTS; RESPONSIBLE; LEAD;                                                                                                                                                  | 0.352     | 602   | 65.22%  |
| <b>WORLD GLOBAL</b>         | WORLD; GLOBAL; TECHNOLOGY; GREAT; DUTIES; SOLUTIONS; PLACE; MAKE; CUSTOMERS; EMPLOYEES; PEOPLE; SERVICES; HIGH; DAY;                                                                                                                                        | 0.408     | 596   | 64.57%  |
| <b>PENSION SCHEME</b>       | PENSION; SCHEME; BENEFITS; DAYS; SALARY; BONUS; COMPETITIVE; EMPLOYEE; OFFER; ANNUAL; ADDITIONAL; LIFE; COMPANY;<br>WORK REMOTELY; PENSION SCHEME; COMPETITIVE SALARY; COMPANY PENSION;                                                                     | 0.528     | 584   | 63.27%  |
| <b>MATERIAL</b>             | MATERIAL; MANUFACTURING; PRODUCTION; MATERIALS; ENGINEERING; SUPPLY; CHAIN; TECHNICAL;<br>SUPPLY CHAIN; SUPPLY CHAIN MANAGEMENT;                                                                                                                            | 0.412     | 566   | 61.32%  |
| <b>JOIN CAREER</b>          | JOIN; CAREER; UK; FUTURE; TRAINING; RETAIL; ORGANISATION; PART; DATE; DIVERSE; EMPLOYEES; OPPORTUNITY; FLEXIBLE;                                                                                                                                            | 0.389     | 544   | 58.94%  |
| <b>JOB TYPES FULLTIME</b>   | FULLTIME; SCHEDULE; YEAR; PERMANENT; JOB; PREFERRED; SHIFT; SALARY; YEARS;<br>WORK REMOTELY; JOB TYPES FULLTIME; JOB TYPES FULLTIME PERMANENT; MONDAY TO FRIDAY; JOB TYPES FULLTIME PERMANENT SALARY; JOB DESCRIPTION; JOB TYPE; SCHEDULE MONDAY TO FRIDAY; | 0.554     | 522   | 56.55%  |
| <b>CUSTOMER SERVICE</b>     | ORDERS; PRODUCTS; CUSTOMER; DISTRIBUTION; STOCK; SERVICE; PRODUCT; CUSTOMERS;<br>CUSTOMER SERVICE;                                                                                                                                                          | 0.368     | 513   | 55.58%  |

|                                      |                                                                                                                                                          |       |     |        |
|--------------------------------------|----------------------------------------------------------------------------------------------------------------------------------------------------------|-------|-----|--------|
| HEALTH AND SAFETY                    | SAFETY; HEALTH; DAILY; WAREHOUSE; SHIFT; STAFF; TRAINING; OPERATION; STOCK; HOURS;                                                                       | 0.412 | 445 | 48.21% |
|                                      | HEALTH AND SAFETY; HEALTH SAFETY; WAREHOUSE MANAGEMENT; DAY TO DAY; PENSION SCHEME; TEAM TO ENSURE;                                                      |       |     |        |
| APPLY CV                             | APPLY; CV; EMPLOYMENT; ROLE; RECRUITMENT;                                                                                                                | 0.346 | 444 | 48.10% |
| SUCCESSFUL CANDIDATE                 | EXPERIENCED; MANAGER; CANDIDATE; POSITION; SUCCESSFUL; JOIN; MAINTAINING;                                                                                | 0.349 | 427 | 46.26% |
|                                      | SUCCESSFUL CANDIDATE;                                                                                                                                    |       |     |        |
| SUPPLIER RELATIONSHIPS CATEGORY      | SUPPLIER; CATEGORY; SOURCING; PROCUREMENT; SUPPLIERS; STRATEGIES; PURCHASING; CONTRACTS; CONTRACT; STRATEGIC;                                            | 0.512 | 408 | 44.20% |
|                                      | CATEGORY MANAGEMENT; SUPPLIER PERFORMANCE; SUPPLIER RELATIONSHIPS; PROCUREMENT TEAM; CONTRACT MANAGEMENT; SUPPLIER MANAGEMENT; PROCUREMENT MANAGER;      |       |     |        |
| LOGISTICS MANAGER                    | WAREHOUSING; PL; LOGISTICS; DISTRIBUTION; WAREHOUSE; TRANSPORT; BUDGET;                                                                                  | 0.401 | 402 | 43.55% |
|                                      | WAREHOUSE MANAGEMENT; LOGISTICS MANAGER; LOGISTICS TEAM; WAREHOUSE OPERATIONS; WAREHOUSE TEAM; SUPPLY CHAIN AND LOGISTICS; LOGISTICS OPERATIONS;         |       |     |        |
| CONTINUOUS IMPROVEMENT               | CONTINUOUS; IMPROVEMENT; IMPLEMENT; IMPROVE; IMPROVEMENTS; PROCESSES; EXCELLENCE;                                                                        | 0.360 | 400 | 43.34% |
|                                      | CONTINUOUS IMPROVEMENT; PROCESS IMPROVEMENT; DEVELOP AND IMPLEMENT; IMPROVEMENT INITIATIVES;                                                             |       |     |        |
| EMPLOYER                             | EMPLOYER; STATUS; OPPORTUNITY; DIVERSITY; EMPLOYMENT; DEGREE; OPPORTUNITIES; CULTURE; VALUES; GLOBAL;                                                    | 0.384 | 393 | 42.58% |
|                                      | SEXUAL ORIENTATION; EQUAL OPPORTUNITIES; FLEXIBLE WORKING; EQUAL OPPORTUNITY; NATIONAL ORIGIN; EQUAL OPPORTUNITY EMPLOYER; EQUAL OPPORTUNITIES EMPLOYER; |       |     |        |
| DIVERSITY                            | DIVERSITY; PROGRAMME; PROJECT; CONSTRUCTION; FLEXIBLE; WORKING; DIVERSE; EMPLOYER;                                                                       | 0.338 | 368 | 39.87% |
|                                      | FLEXIBLE WORKING; EXPERIENCE OF WORKING; EXPERIENCE WORKING; SEXUAL ORIENTATION; WORKING ENVIRONMENT; WORKING KNOWLEDGE;                                 |       |     |        |
| INTERNAL AND EXTERNAL                | EXTERNAL; INTERNAL; RELEVANT; COMPLEX; STAKEHOLDERS; RELATED; RELATIONSHIPS;                                                                             | 0.344 | 329 | 35.64% |
|                                      | INTERNAL AND EXTERNAL; INTERNAL AND EXTERNAL STAKEHOLDERS; KEY STAKEHOLDERS; CATEGORY MANAGEMENT; SUPPLIER RELATIONSHIPS;                                |       |     |        |
| INVENTORY MANAGEMENT DEMAND PLANNING | DEMAND; INVENTORY; PLANNING; FORECASTING; STOCK; SYSTEM;                                                                                                 | 0.389 | 290 | 31.42% |
|                                      | INVENTORY MANAGEMENT; DEMAND PLANNING; STOCK CONTROL; STOCK LEVELS; STOCK MANAGEMENT; INVENTORY LEVELS; COMMUNICATION SKILLS; SUPPLY PLANNING;           |       |     |        |
| AMAZON                               | AMAZON; SECURITY; SUCCESS; DIVERSE; BUILD; BASED; DATA; PERSONAL;                                                                                        | 0.380 | 267 | 28.93% |
|                                      | DATA PROTECTION; FLEXIBLE WORKING; PRIVACY POLICY; SUPPLY CHAIN AND LOGISTICS;                                                                           |       |     |        |
| LIFE ASSURANCE                       | GOALS; APPROPRIATE; LIFE; PRODUCT; APPROACH; END; HOURS; TECHNICAL;                                                                                      | 0.330 | 250 | 27.09% |
|                                      | END TO END; LIFE ASSURANCE; BUSINESS GOALS; PRODUCT DEVELOPMENT;                                                                                         |       |     |        |

|                               |                                                                                                                                                                                                                                                                                                        |       |     |        |
|-------------------------------|--------------------------------------------------------------------------------------------------------------------------------------------------------------------------------------------------------------------------------------------------------------------------------------------------------|-------|-----|--------|
|                               | RECORD; TRACK; PROVEN;                                                                                                                                                                                                                                                                                 |       |     |        |
| TRACK RECORD                  | TRACK RECORD; PROVEN TRACK RECORD; PROVEN EXPERIENCE; PROVEN ABILITY; CAREER MOVE SIMPLY APPLY ONLINE; DATE CV IS ATTACHED; PROVEN TRACK RECORD OF ACHIEVEMENT; HIGH PROFILE; ROLE INCLUDE; EXPERIENCE PROVEN;                                                                                         | 0.352 | 206 | 22.32% |
|                               | CLIENTS; CLIENT; CONSTRUCTION; PROJECT; PROFESSIONAL; WORKS;                                                                                                                                                                                                                                           |       |     |        |
| PROJECT MANAGEMENT CLIENTS    | PROJECT MANAGEMENT; PROFESSIONAL SERVICES; FLEXIBLE WORKING; PROJECT TEAM; SUCCESSFUL DELIVERY; PROJECT MANAGER; INCLUSIVE CULTURE; FLEXIBLE WORKING ARRANGEMENTS; PRIVATE SECTOR; CONTRACT MANAGEMENT; BUSINESS DEVELOPMENT; PROJECT DELIVERY;                                                        | 0.371 | 180 | 19.50% |
|                               | WIDER; ANNUAL; PLAN; LINE; AGREED; DEPARTMENT;                                                                                                                                                                                                                                                         |       |     |        |
| ANNUAL LEAVE WIDER BUSINESS   | ANNUAL LEAVE; WIDER BUSINESS; LINE MANAGEMENT; DAYS ANNUAL LEAVE; LINE MANAGER; IDENTIFY OPPORTUNITIES; WORKLIFE BALANCE; BUSINESS PLAN; ACROSS THE BUSINESS; QUALITY STANDARDS; TEAM TO ENSURE;                                                                                                       | 0.310 | 162 | 17.55% |
|                               | APPLICATIONS; NHS; CONTACT; PROVIDE; APPLICATION;                                                                                                                                                                                                                                                      |       |     |        |
| POINT OF CONTACT APPLICATIONS | POINT OF CONTACT; CLOSING DATE; PRIVACY POLICY; HIGH VOLUME OF APPLICATIONS; PERSONAL INFORMATION; RECRUITMENT PROCESS; PROVIDE SUPPORT; REASONABLE ADJUSTMENTS; HIGH VOLUME; APPLICATIONS FROM CANDIDATES; HEALTH AND WELLBEING; MANAGING MULTIPLE; RESERVE THE RIGHT TO CLOSE; DISABILITY CONFIDENT; | 0.329 | 155 | 16.79% |
|                               | CUSTOMS; EXPORT; INTERNATIONAL; COMPLIANCE;                                                                                                                                                                                                                                                            |       |     |        |
| IMPORT EXPORT CUSTOMS         | IMPORT EXPORT; IMPORT AND EXPORT; TRADE COMPLIANCE; EXPORT CONTROL; CUSTOMS REGULATIONS; DOMESTIC AND INTERNATIONAL; ENSURE COMPLIANCE; CUSTOMS COMPLIANCE; INTERNATIONAL TRADE; MANAGEMENT MANAGE; INTERNATIONAL MARKETS;                                                                             | 0.360 | 90  | 9.75%  |
