# Supplementary material
Source: MDPI journal article supplement (https://www.mdpi.com/2071-1050/13/17/9977)
Supplement: s1 [file s1 › S2v2.pdf]

| lower_ve..  | lower_noun     | occupation           |                    |
|-------------|----------------|----------------------|--------------------|
|             |                | supply chain manager | operations manager |
| analyse     | data           | 5,19%                |                    |
| apply       | cv             | 4,55%                |                    |
|             | role           | 4,55%                |                    |
| build       | relationship   | 7,79%                | 12,24%             |
| consider    | role           |                      | 7,14%              |
| develop     | plan           | 6,49%                | 12,24%             |
|             | relationship   | 9,74%                | 16,33%             |
|             | skill          |                      | 7,14%              |
|             | solution       | 4,55%                |                    |
|             | strategy       | 11,04%               |                    |
|             | team           |                      | 7,14%              |
| drive       | improvement    |                      | 11,22%             |
| ensure      | compliance     | 12,34%               | 10,20%             |
|             | delivery       | 7,79%                | 12,24%             |
|             | level          | 5,19%                |                    |
|             | operation      |                      | 10,20%             |
|             | standard       |                      | 7,14%              |
|             | team           |                      | 18,37%             |
| establish   | relationship   | 4,55%                |                    |
| have        | ability        | 5,84%                |                    |
|             | experience     | 21,43%               | 22,45%             |
|             | knowledge      | 4,55%                |                    |
|             | record         | 4,55%                |                    |
|             | skill          | 7,14%                |                    |
| identify    | opportunity    | 7,79%                | 9,18%              |
| improve     | performance    | 7,79%                |                    |
| include     | management     | 5,84%                |                    |
|             | planning       | 5,19%                |                    |
| influence   | skill          | 7,14%                |                    |
| join        | team           | 6,49%                |                    |
| lead        | team           | 15,58%               | 21,43%             |
| look        | manager        | 12,99%               | 11,22%             |
| maintain    | relationship   |                      | 9,18%              |
| make        | decision       | 7,14%                | 12,24%             |
|             | recommendation | 4,55%                |                    |
| manage      | operation      |                      | 8,16%              |
|             | process        | 4,55%                |                    |
|             | relationship   | 5,19%                |                    |
|             | team           | 11,04%               | 19,39%             |
| meet        | deadline       | 4,55%                |                    |
| play        | role           | 5,84%                |                    |
| prove       | ability        | 7,79%                |                    |
|             | experience     | 7,14%                | 9,18%              |
|             | record         | 5,84%                | 11,22%             |
| provide     | leadership     | 7,14%                |                    |
|             | service        | 4,55%                |                    |
|             | solution       |                      | 7,14%              |
|             | support        | 7,14%                | 10,20%             |
| reduce      | cost           | 7,14%                |                    |
| require     | duty           |                      | 10,20%             |
|             | experience     | 5,19%                |                    |
| resolve     | issue          | 4,55%                | 8,16%              |
| work        | environment    | 13,64%               | 7,14%              |
|             | experience     | 4,55%                |                    |
|             | knowledge      | 5,19%                | 7,14%              |
|             | pressure       | 5,19%                |                    |
|             | scheme         |                      | 7,14%              |
|             | stakeholder    | 5,19%                |                    |
|             | supplier       | 4,55%                |                    |
|             | team           | 8,44%                | 9,18%              |
| write       | skill          | 7,14%                |                    |
| Grand Total |                | 100,00%              | 100,00%            |

% of Total Distinct count of jobID broken down by occupation vs. lower\_verb and lower\_noun. Color shows % of Total Distinct count of jobID. The marks are labeled by % of Total Distinct count of jobID. The data is filtered on distinct count of jobID, which ranges from 7 to 39. The view is filtered on occupation and lower\_noun. The occupation filter keeps operations manager and supply chain manager. The lower\_noun filter excludes and ). Percents are based on each column of the table.

% of Total Distinct..

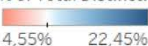

4,55% 22,45%

**Figure S2.** Competences of supply chain manager versus operation manager
