# Supplementary material
Source: MDPI journal article supplement (https://www.mdpi.com/2071-1050/13/17/9977)

## handling waste in November, 2020

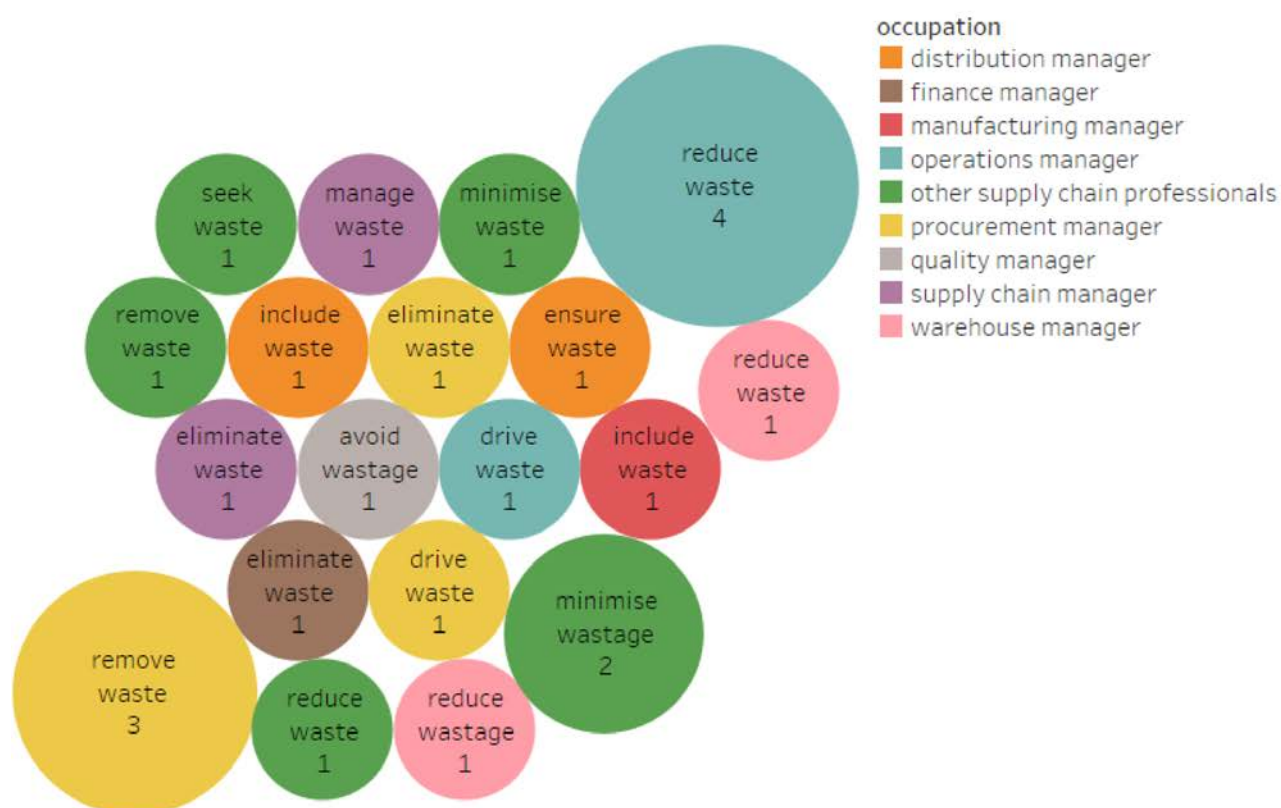

## handling waste in May, 2021

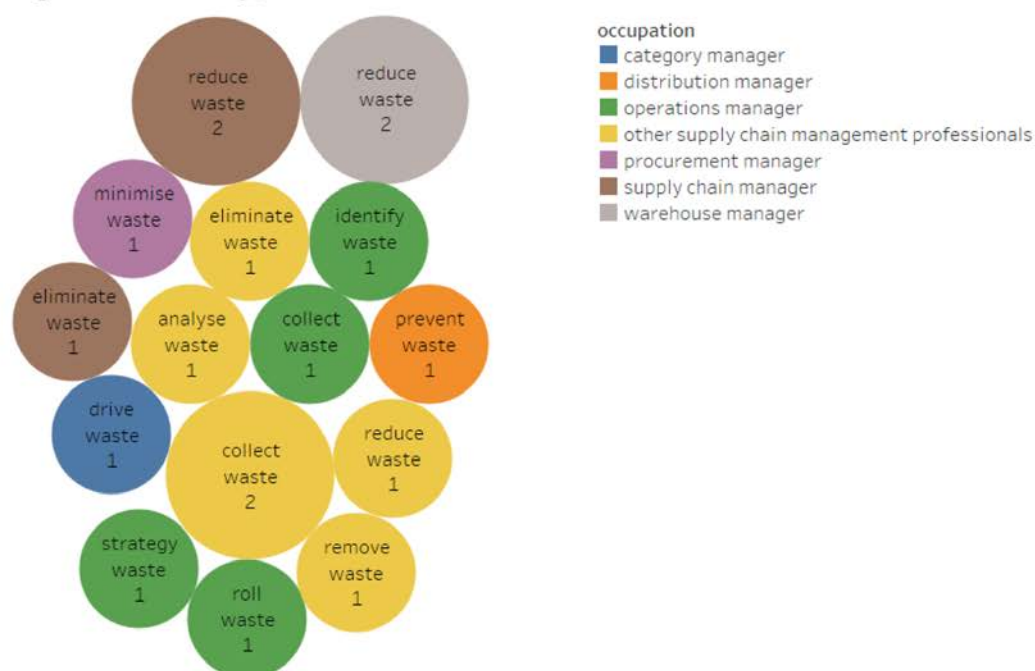

**Figure S3.** Waste management in November 2020 and May 2021

Supplement: s1 [file s1 › S3v2.pdf]
